# Supplementary material for: Outcomes of Mobilisation of Vulnerable Elders in Ontario (MOVE ON): a multisite interrupted time series evaluation of an implementation intervention to increase patient mobilisation
Source: PubMed Central journal article supplement — Age Ageing. 2017 Jul 15;47(1):112–9. doi: 10.1093/ageing/afx128 (PMC5859974; doi:10.1093/ageing/afx128), 2017-07-15
Supplement: aa-17-0131-file013.pdf [file aa-17-0131-file013.pdf]

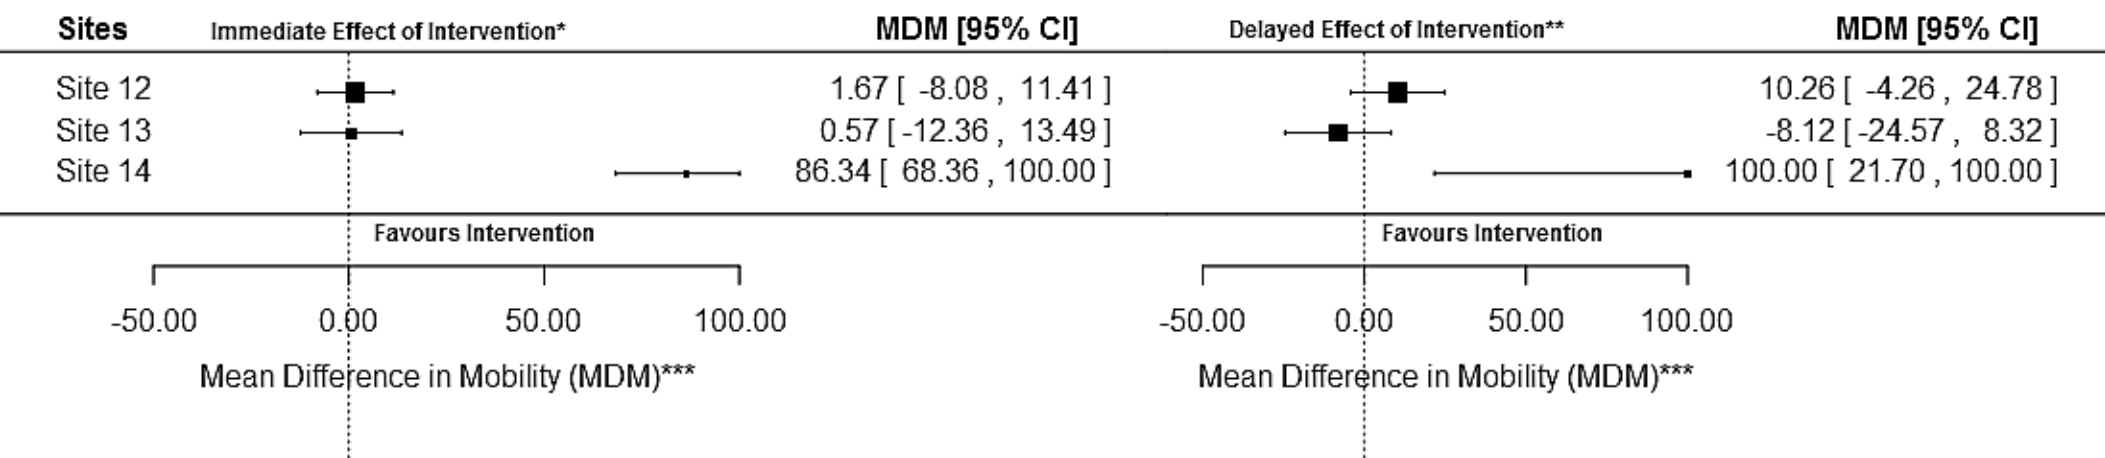

\* Immediate effect = difference in pre- and during-intervention estimates

\*\* Delayed effect = difference in pre- and post-intervention estimates

\*\*\* Difference in levels (intercepts)
